# Supplementary figures and images for: Moisture changes inside hydrogel particles during their drying process investigated with fluorescence lifetime imaging
Source: Royal Society of Chemistry journal article supplement (doi:10.1039/d4cp02684e), 2024-01-01

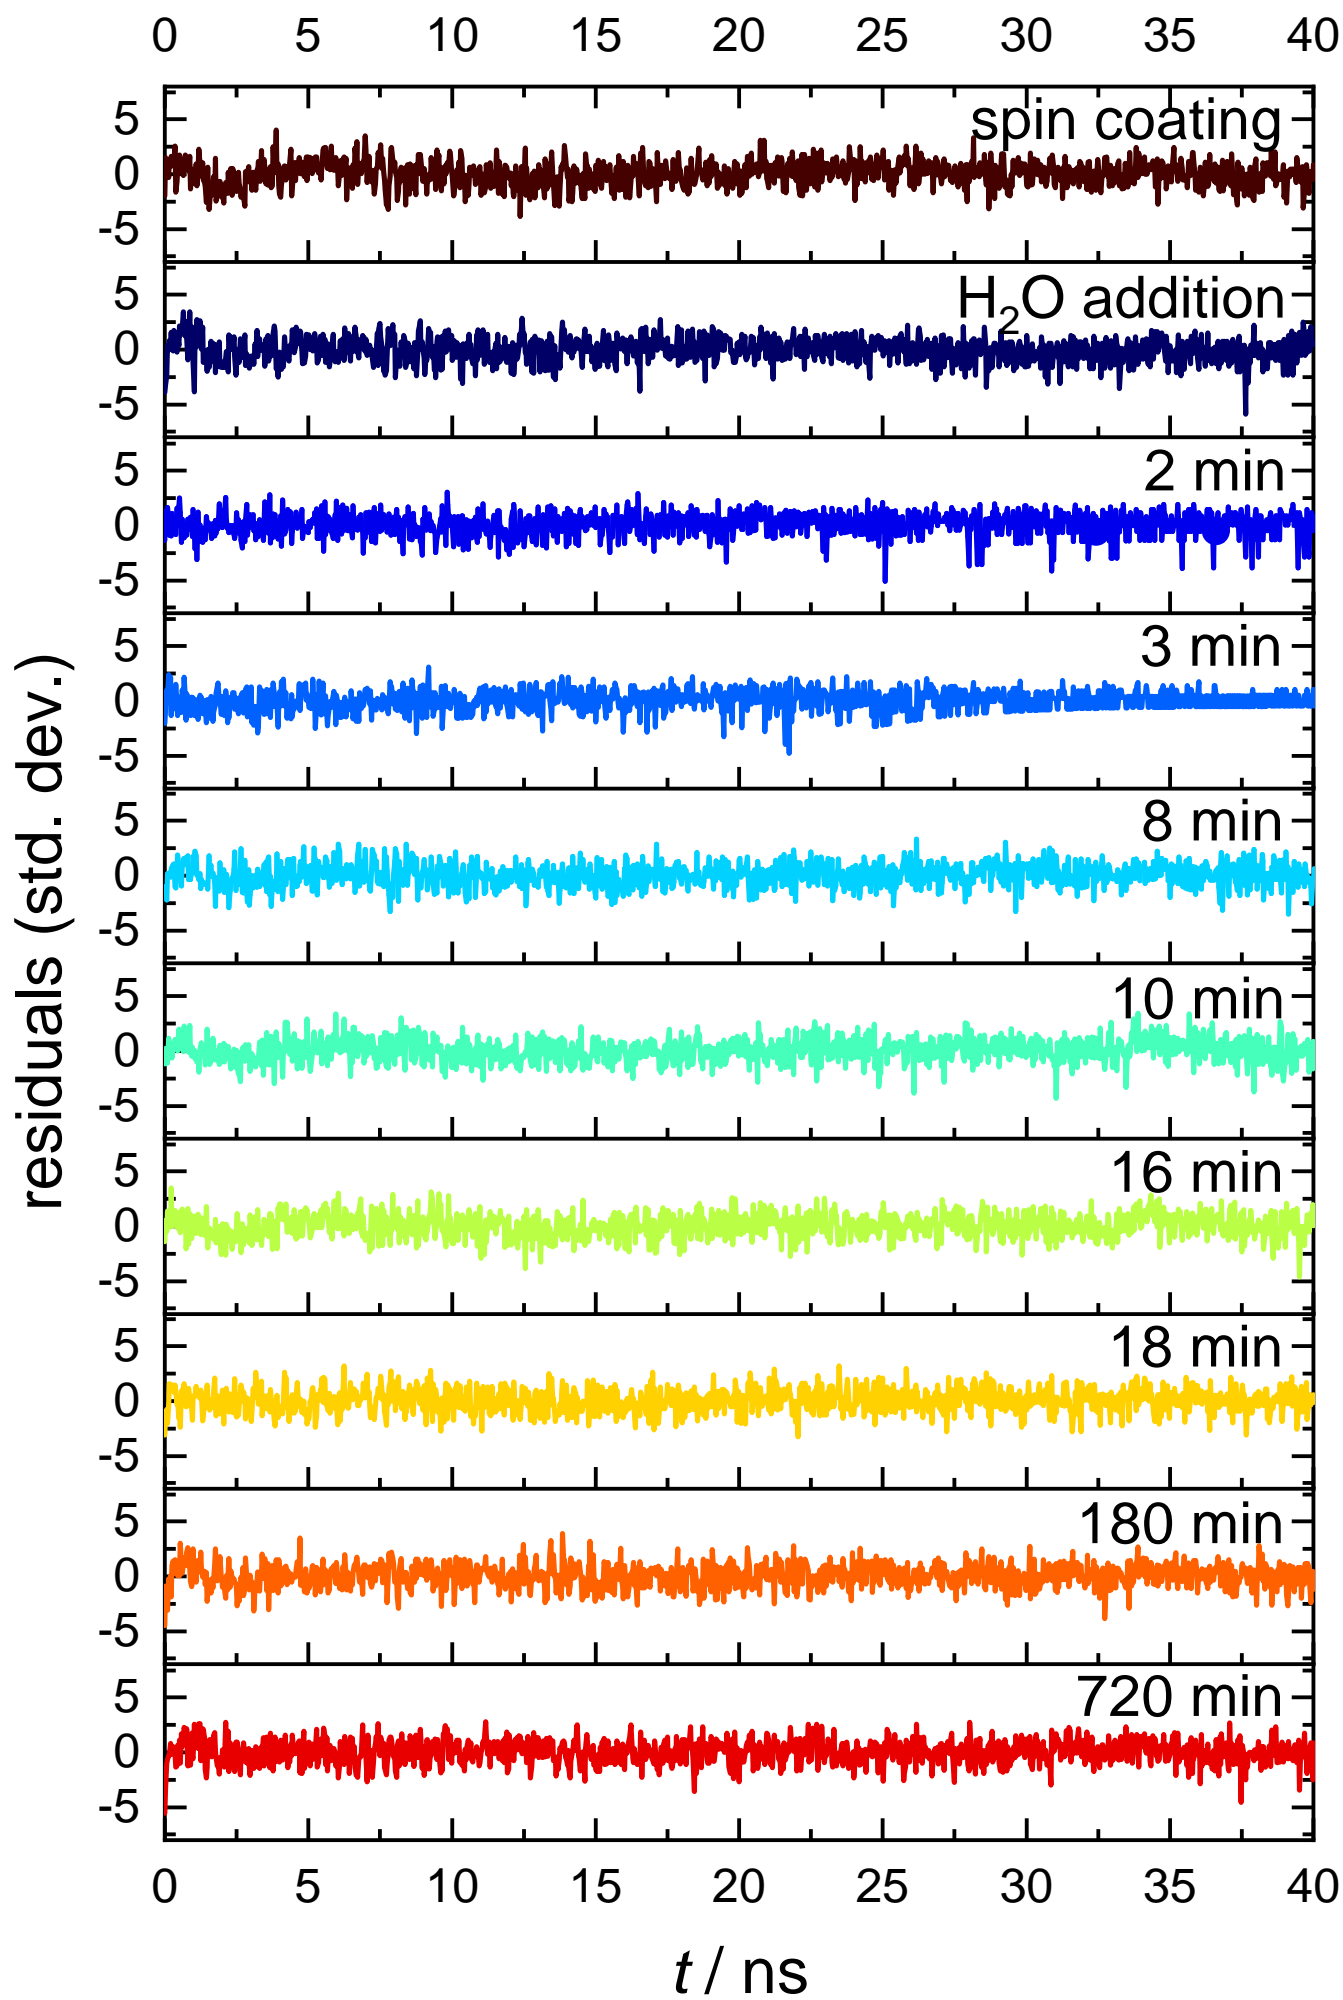

Supplement: d4cp02684e2.zip [file d4cp02684e2.zip]

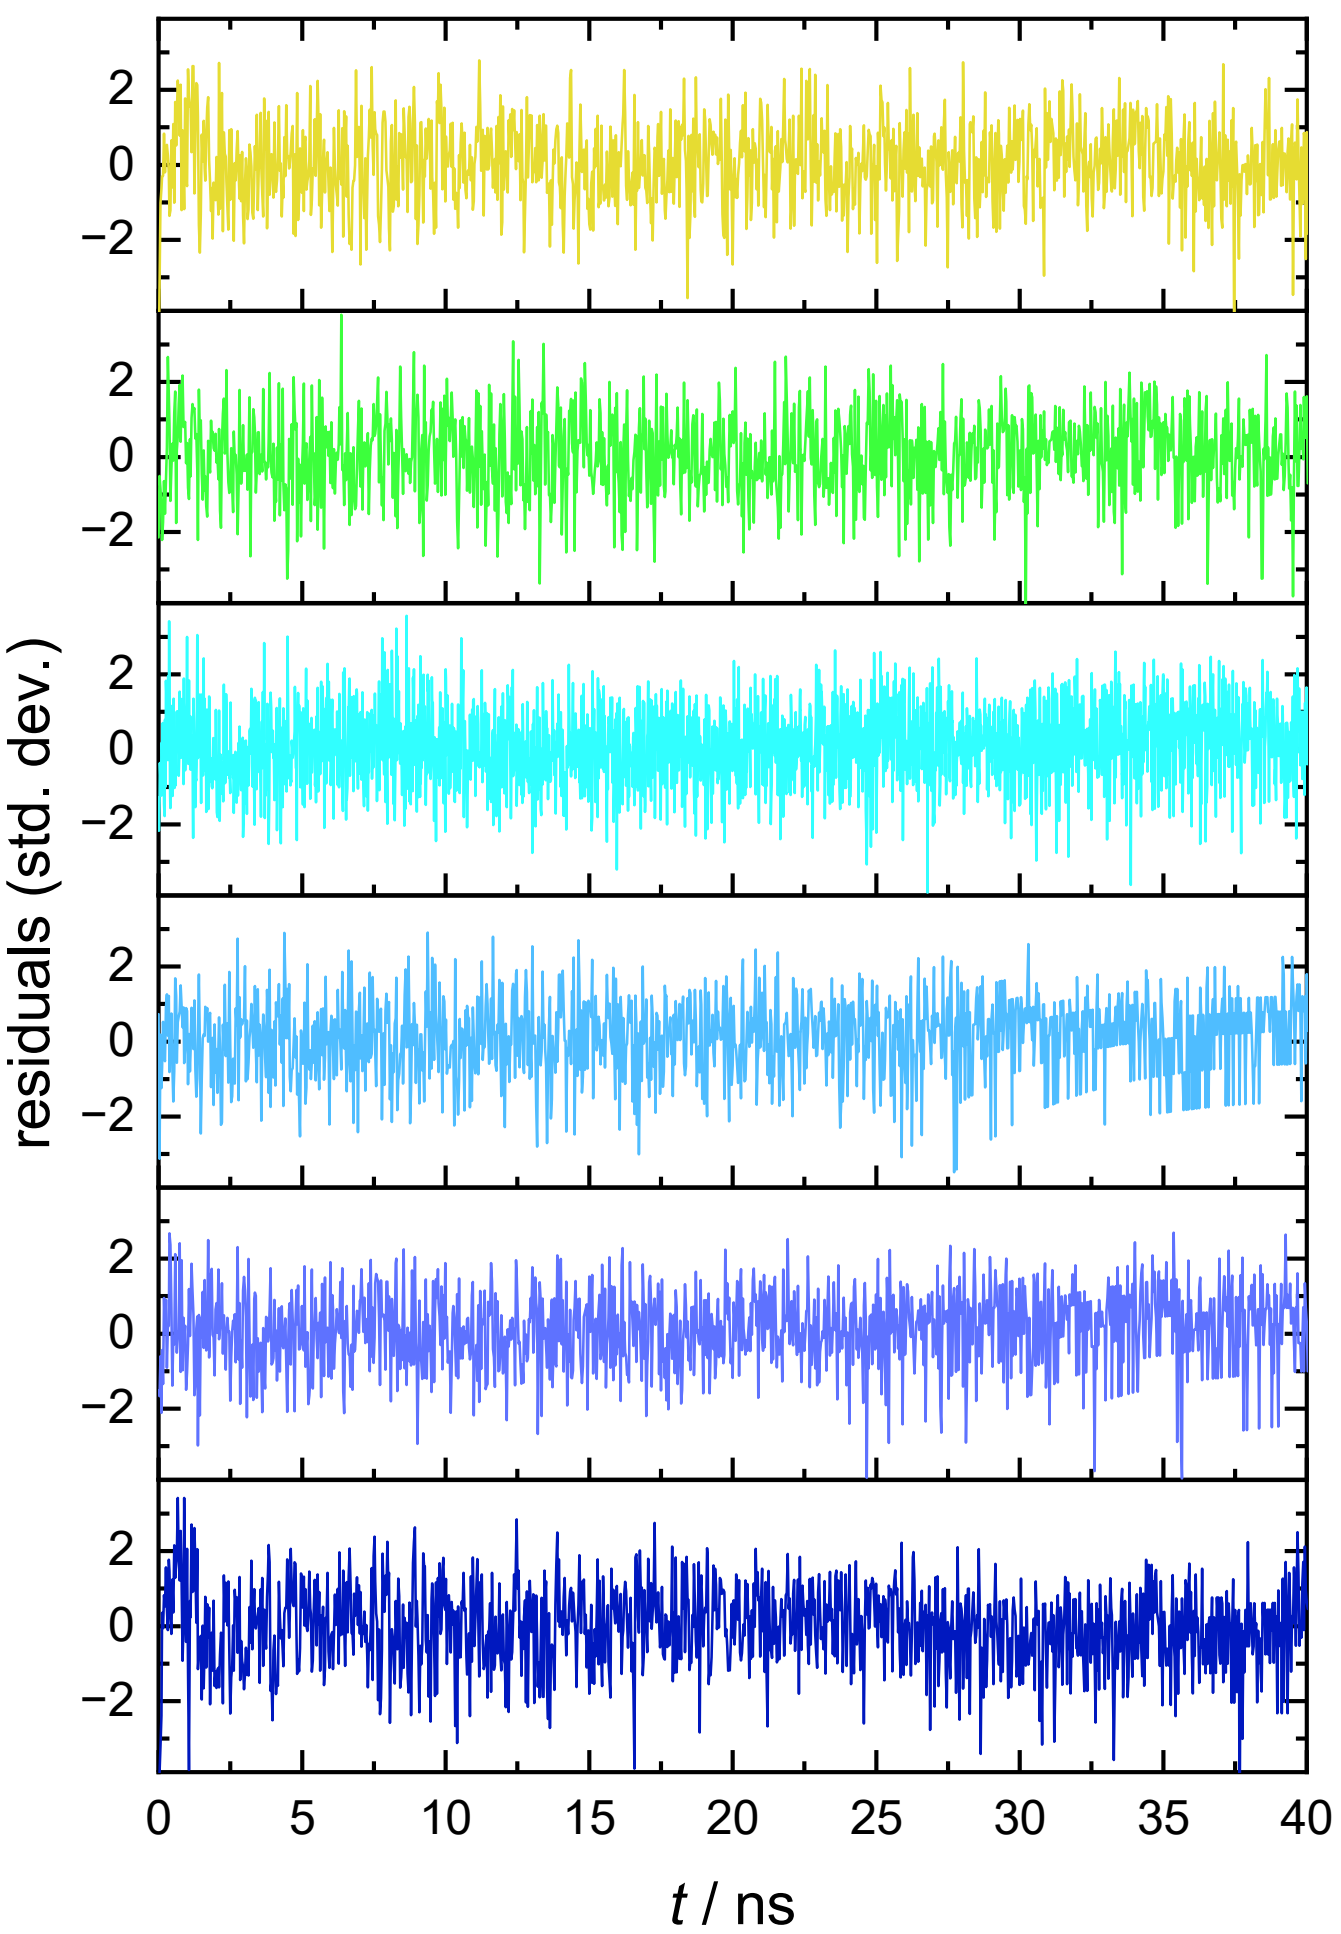

Supplement: d4cp02684e2.zip [file d4cp02684e2.zip]

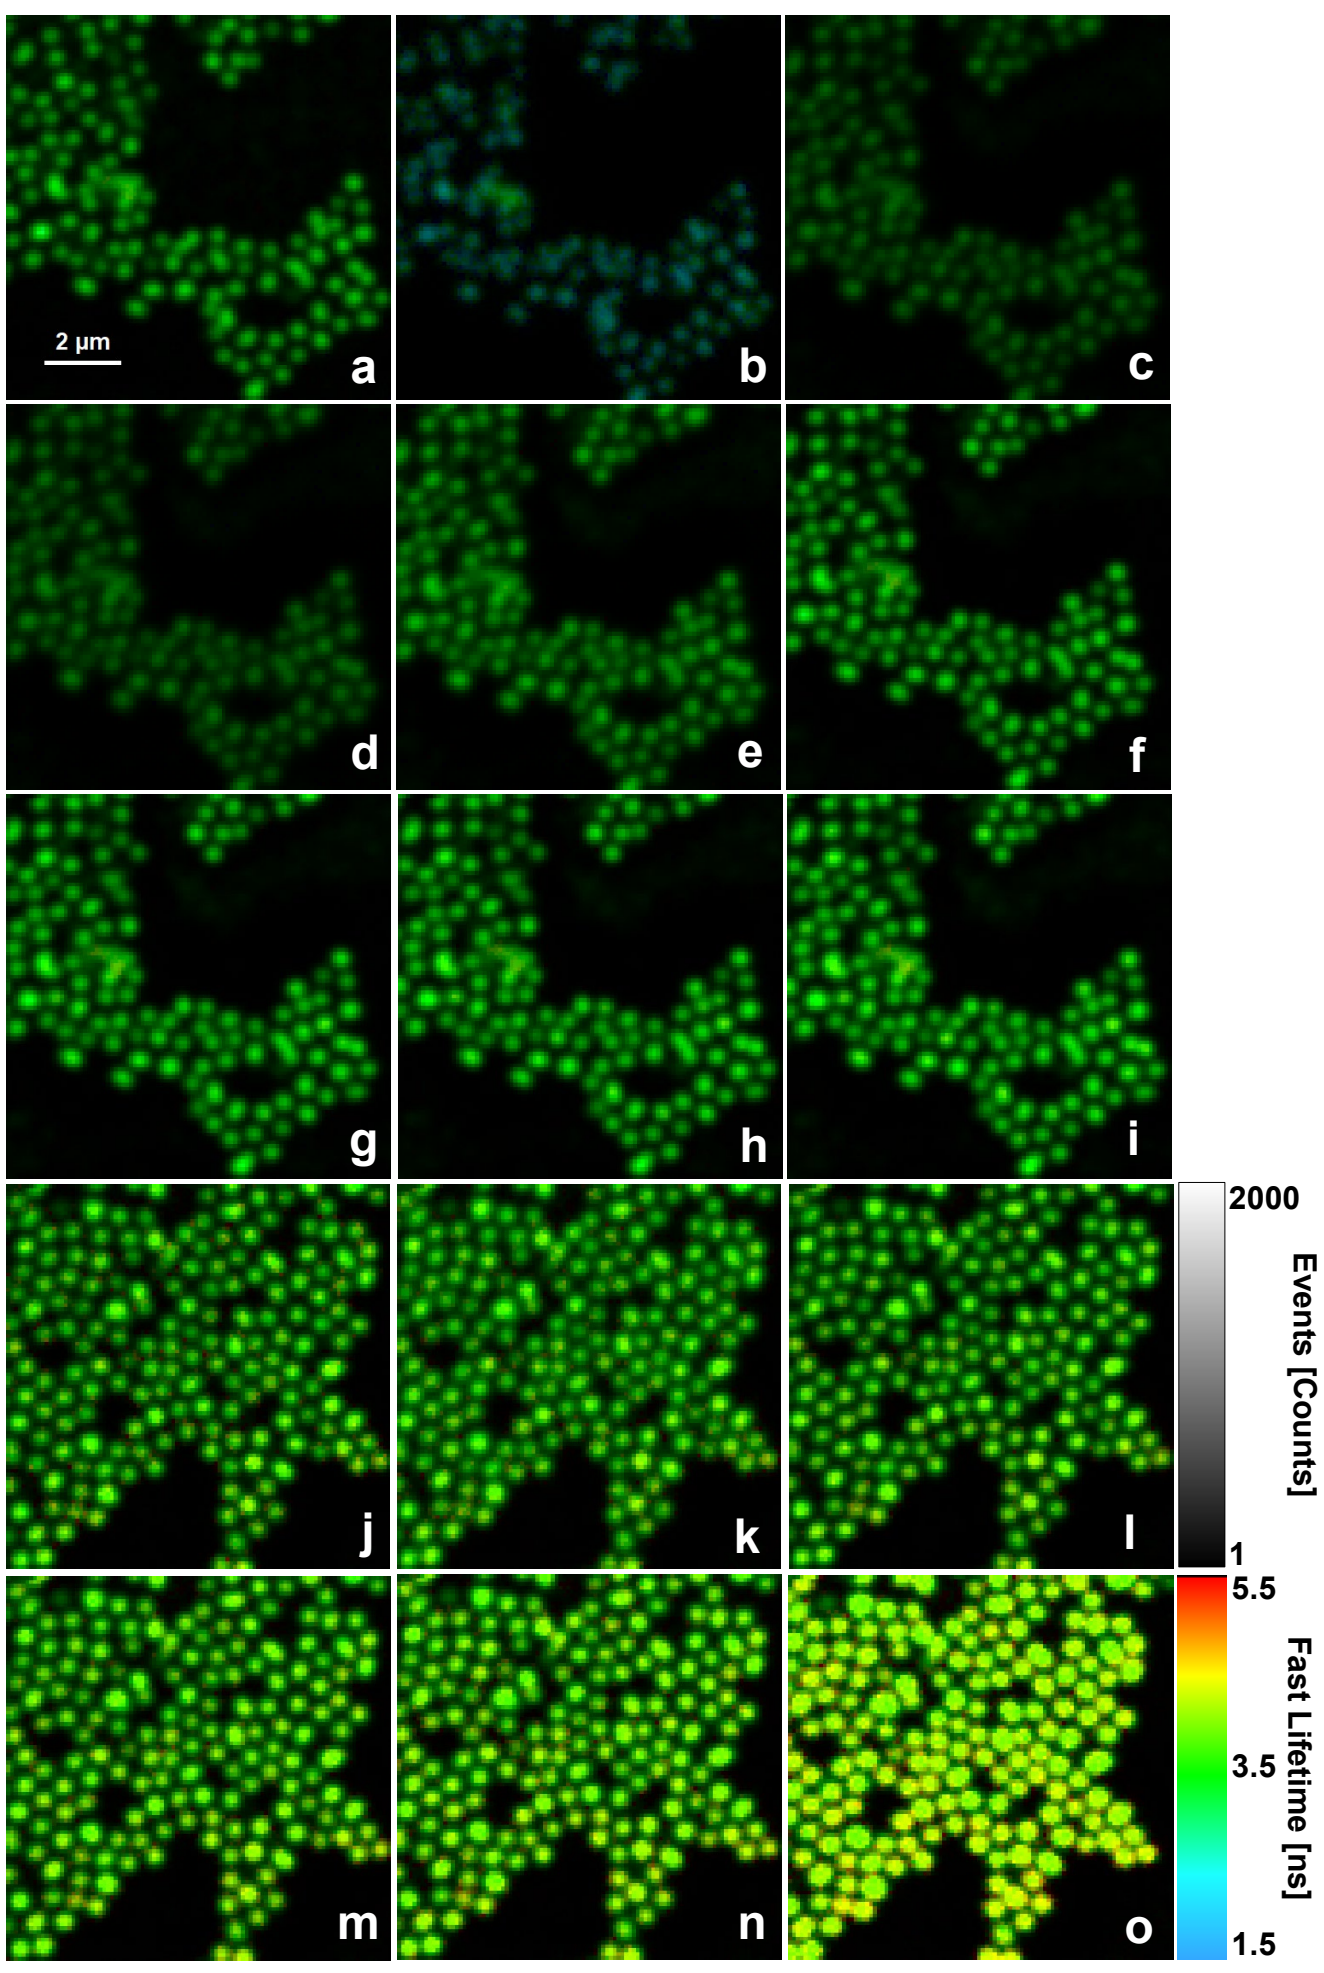

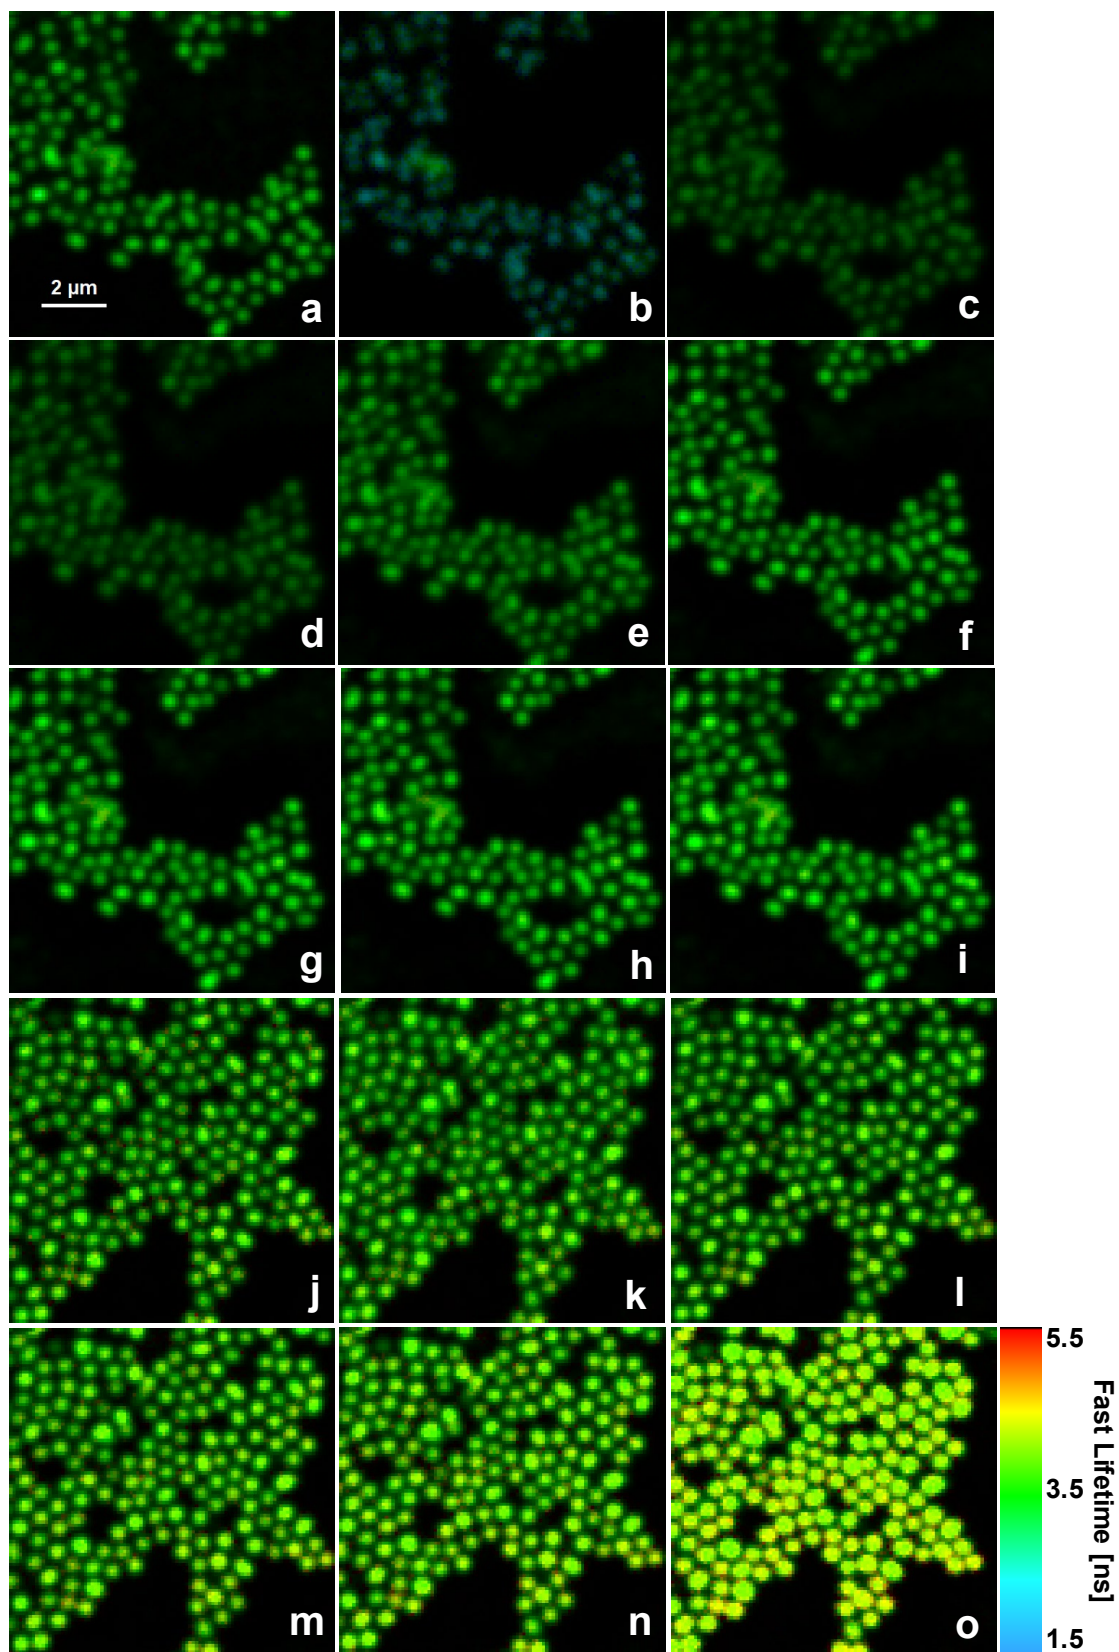

Supplement: d4cp02684e2.zip [file d4cp02684e2.zip]

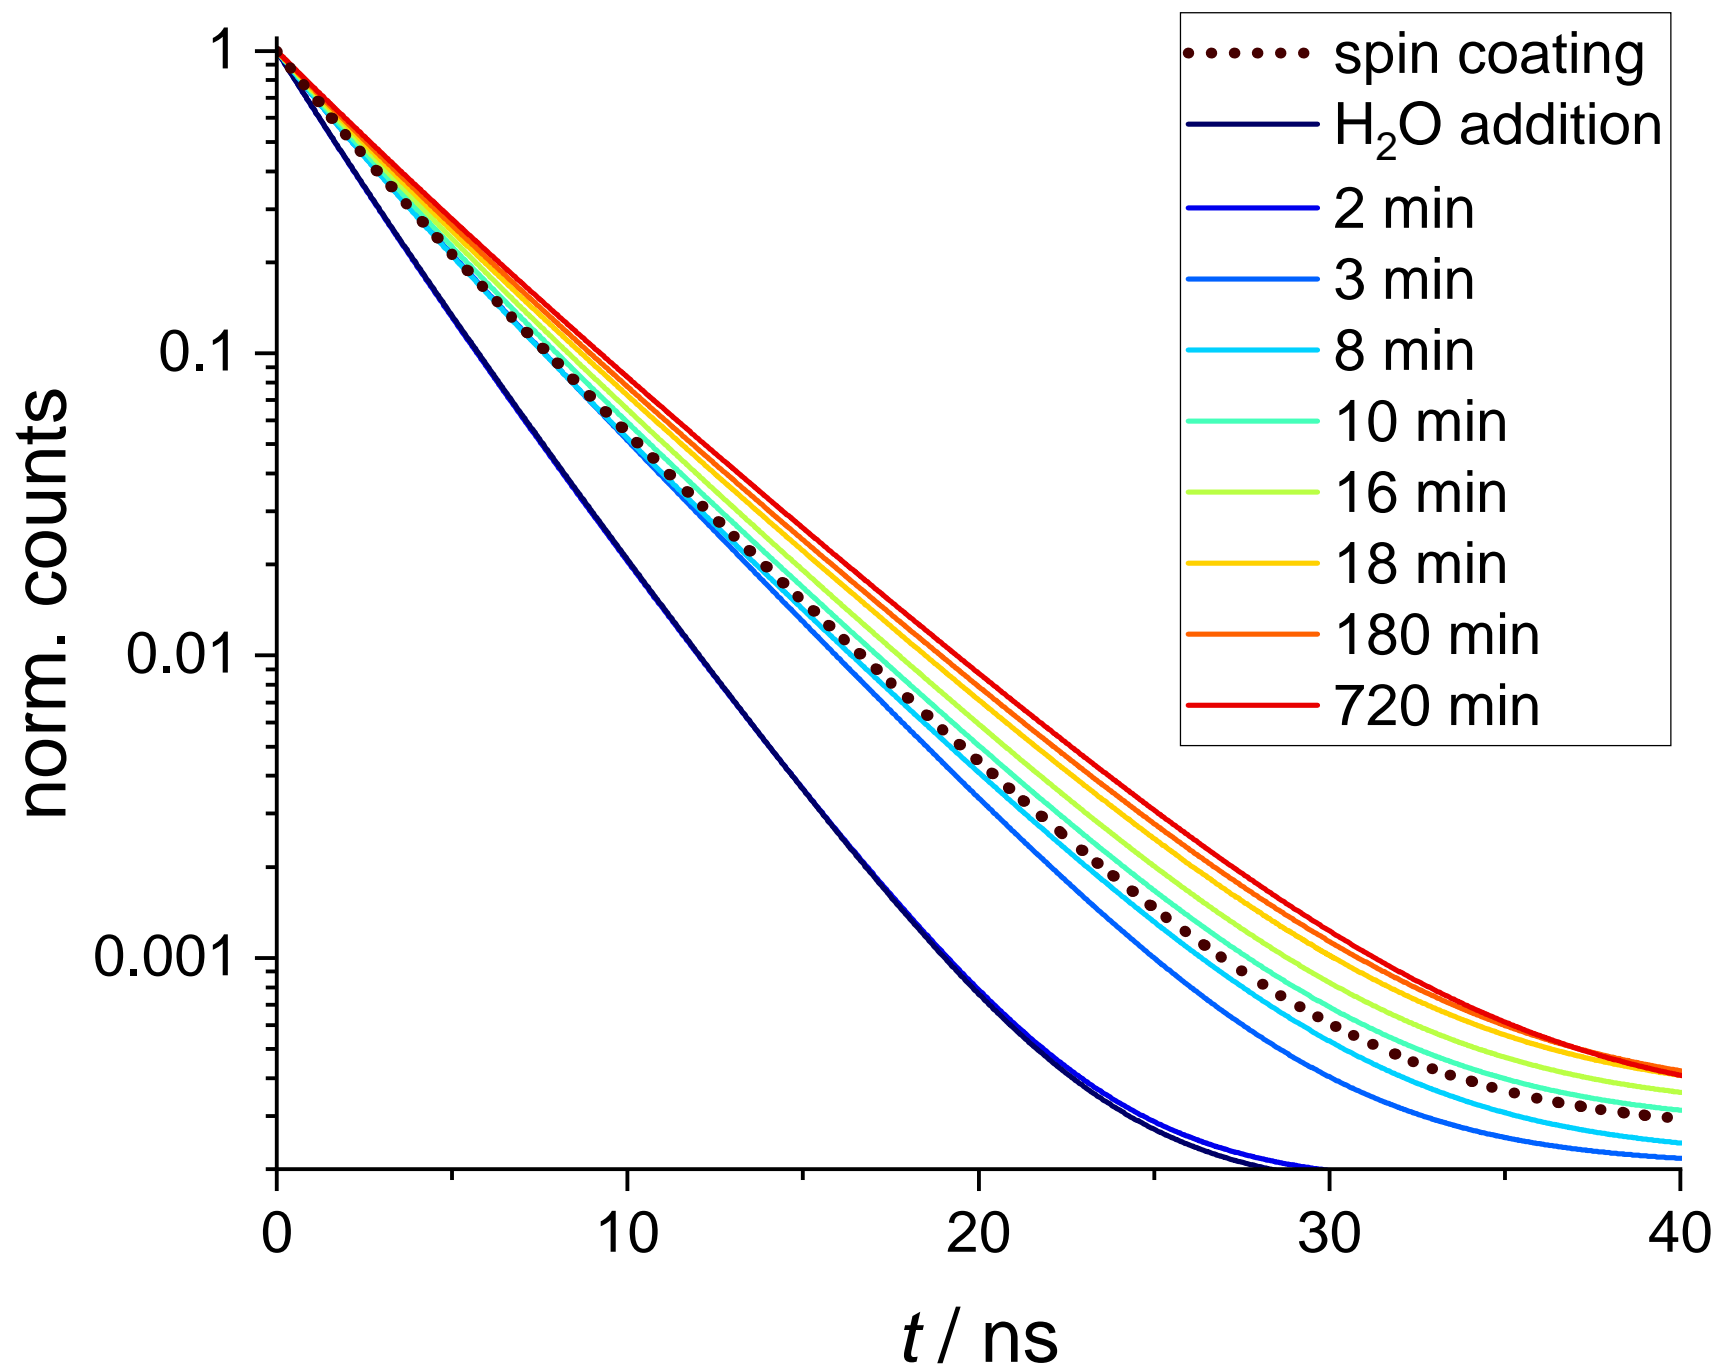

Supplement: d4cp02684e2.zip [file d4cp02684e2.zip]

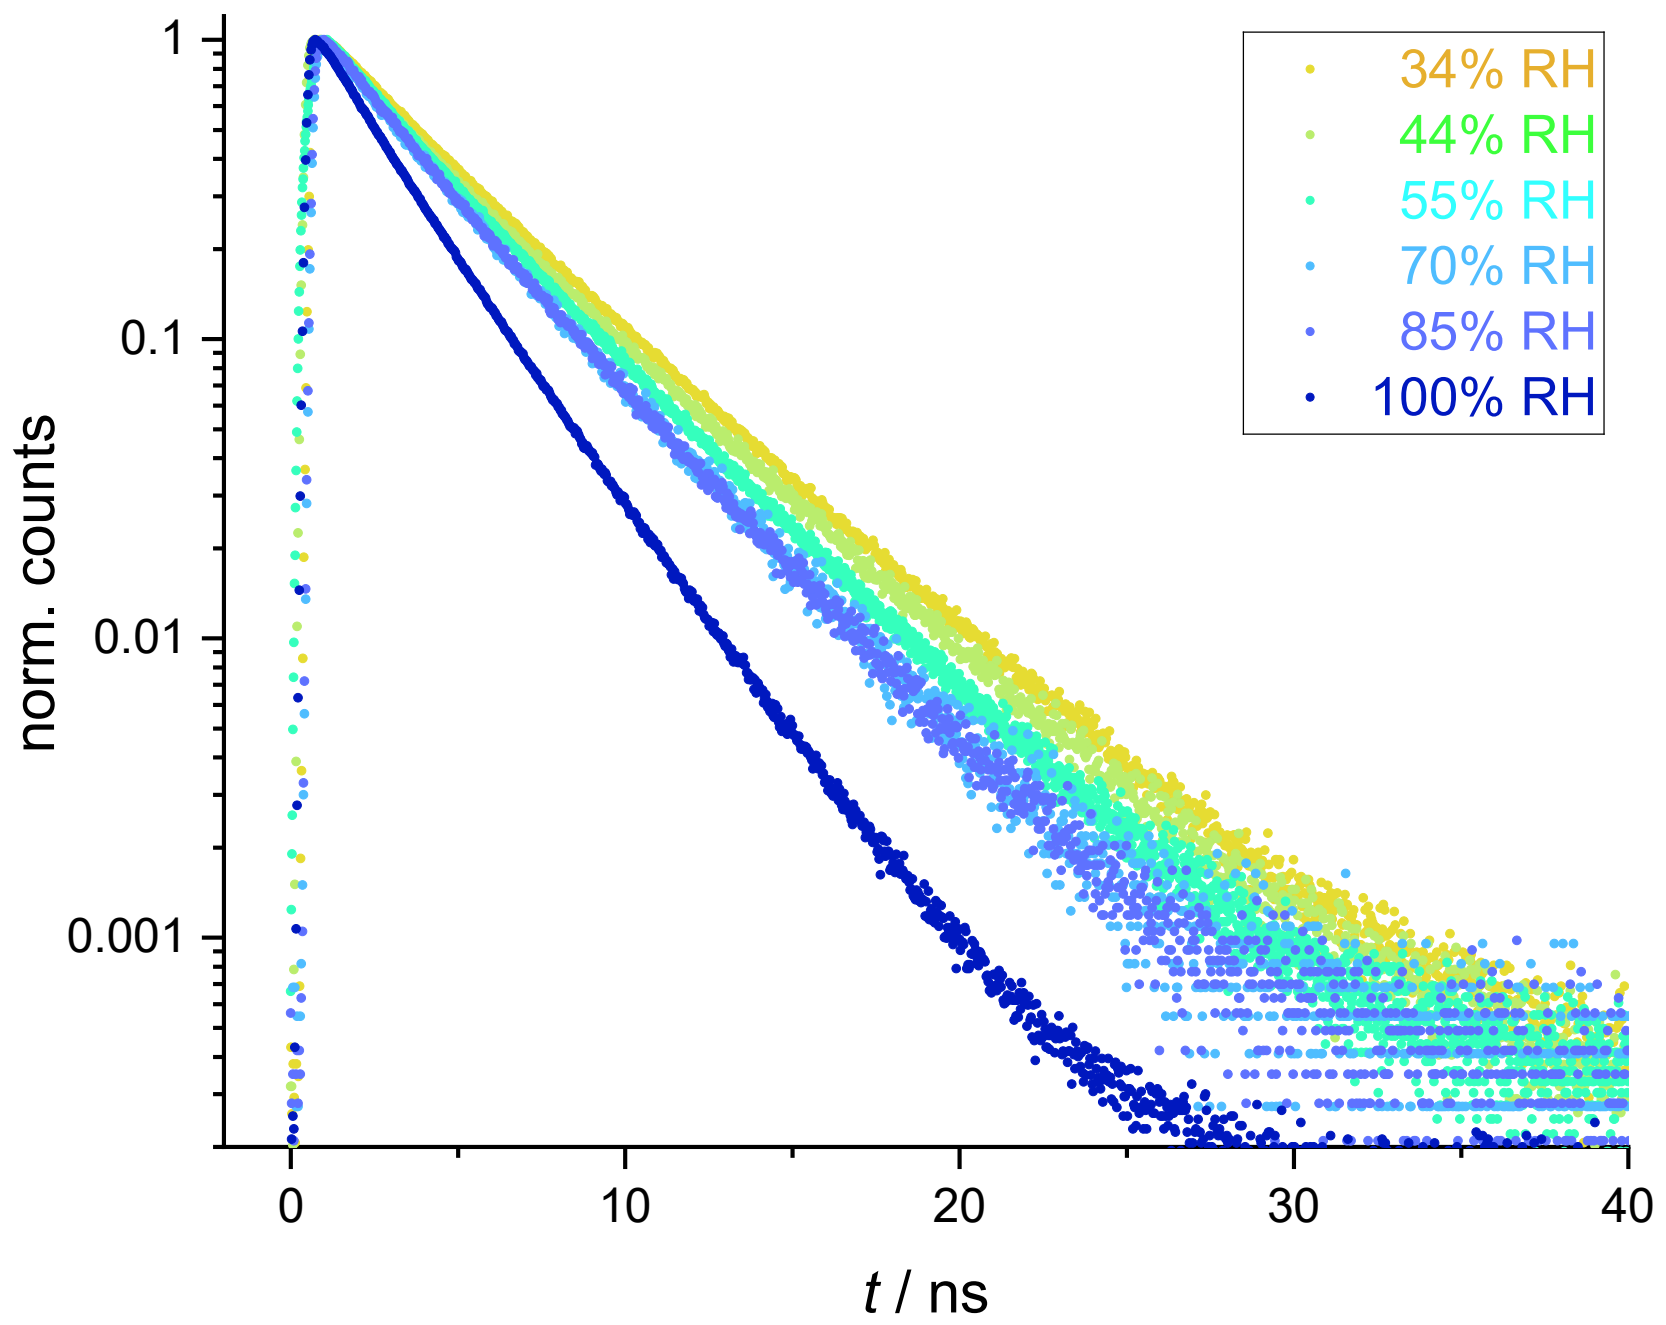

Supplement: d4cp02684e2.zip [file d4cp02684e2.zip]
